# Supplementary material
Source: PubMed Central journal article supplement (PMC4107462)

**Supplementary figure 1.** MicroCT analysis of tibias in *Ext1<sup>ff</sup>* and *Ext1<sup>ff</sup>;Col2CreERT* mice. *Ext1<sup>ff</sup>* (A and C) and *Ext1<sup>ff</sup>;Col2CreERT* (B and D) mice received a tamoxifen injection (100 µg/10 µl/mouse) at P5. The hindlimbs were collected 4 weeks after the injection. MicroCT scan was performed on whole tibias and the 3D images were reconstructed for the entire bones (A and B) and the trabecular bones in the primary spongiosa (C and D).

**Supplementary figure 2.** Distribution of Perlecan in outgrowth formation over time. Longitudinal serial sections were prepared of the wrist region of *Ext1<sup>ff</sup>;Col2CreERT* mice tamoxifen-injected at P5 and harvested 2 and 8 weeks later. Sections were processed for Perlecan immunostaining using domain 5 antibodies (A-F). Note that positive staining appeared clearly visible throughout their structure, reflecting their growth plate-like character, and became inhomogeneous over time. Bars= 1 mm (A-B); 500 µm (C-D); 200 µm (E, F).

# Supplementary figure 1

*Control*

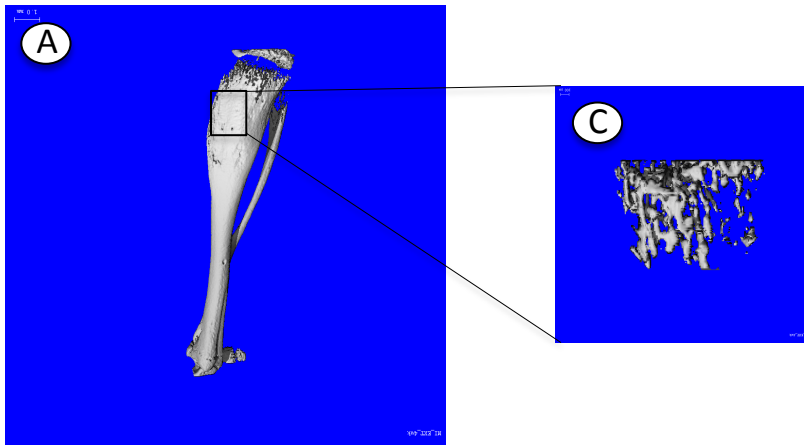

*CKO*

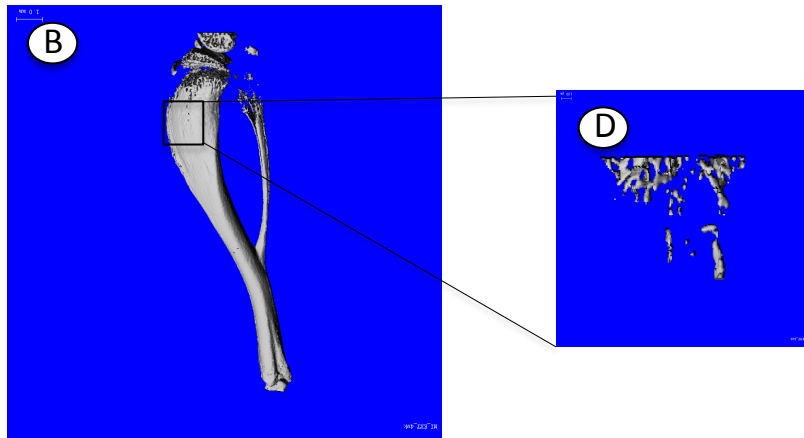

Supplementary Figure 2

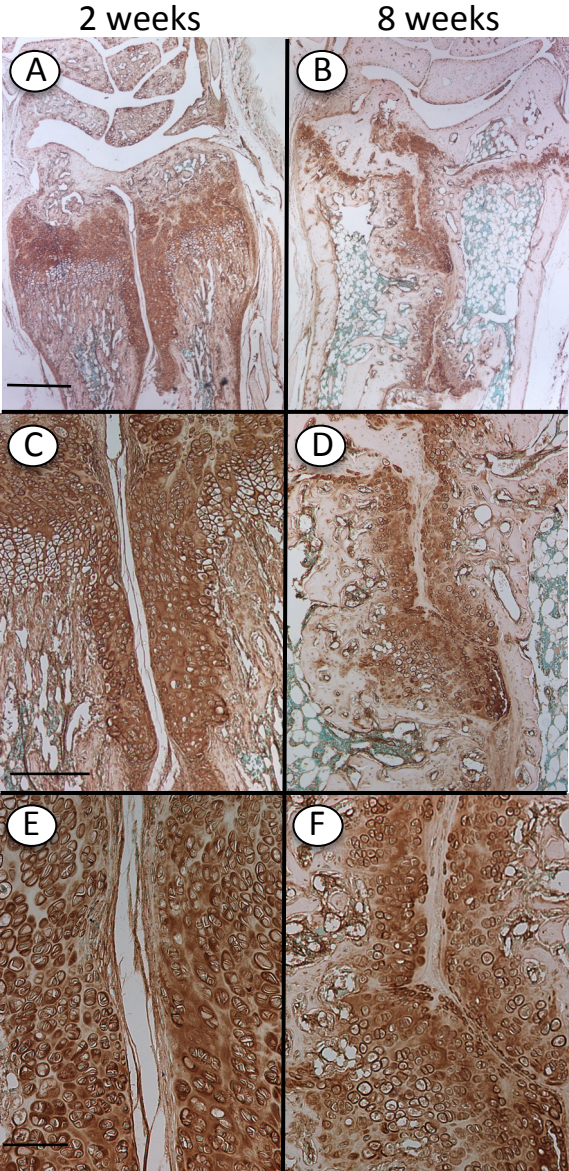

Supplement: NIHMS516729-supplement-01.pdf [file NIHMS516729-supplement-01.pdf]
